# Supplementary material
Source: PubMed Central journal article supplement (PMC4424017)
Supplement: supp_pp.114.255802_255802supplementaldata.pdf [file supp_pp.114.255802_255802supplementaldata.pdf]

CLUSTAL 2.1 multiple sequence alignment

```

S.tuberosum   MADLNPFDLLGDDDDNDPSKLIAIHQQKVDPAKRASAPAAAAAKQPAKLPTKPPPPTQA 60
A.thaliana   MATLNPFDLL-DDDAEDPS-QLAVAIEKIDKSKKSGQVSSSLPAKSAP-KLPSKPLPPAQA 57
** ***** *** :*** *: *:* :*:. :. :.***. * ***:** **:*

S.tuberosum   VREAKTEFGRGGGRGGGRGYSRGRGGGGFNREASNENFSRNREFSG--GIAAPEYMEGG 118
A.thaliana   VREARSDAPRGGG--GRGGFNRRG--GYNRDDGNNGYSGGYTKPSGEGDVSKSSYERRG 113
****:.. ***** * *:.***** *:*:.** . : ** .:..* . *

S.tuberosum   RPSERRGGYGGP-HAFRGGRRPGGFGNEEMPEGDRPRRTFERRSGTGRGNEIKREGAGRGN 177
A.thaliana   GGGAPRGSFRGEGGGPGGRRGGFSNEGG-DGERPRRAFERRSGTGRGSDFKRDGSGRGN 172
. **.: * . *** **.* *:*:*****:*****:***:****

S.tuberosum   WGTEADEVTQMTGEVADEGEKNLNVEKPSSTEEAGDDKKNPAAEAEDKEPEDKEMTLEE 237
A.thaliana   WGTPGEEIAAETEAVAGVETEKDVGEKPAVDDVAADANKED--TVVEEKEPEDKEMTLDE 230
*** .:..: * **. :. ***:..: *. * :*: : .*:*****:*

S.tuberosum   YEKLLEEKRKALQALKTEERKVDTKVFESMQQIS-KKPSDEIFVKLGS-KDKRKE SAEKE 295
A.thaliana   YEKILEEKKKALQSLTTSEKVDTKVFESMQQLSNKKSND EIFIKLGS DDKRKD--DKE 288
***:*****:*****:*. *.*****:*****:* **..*****:***** *****: :**

S.tuberosum   EKAKKAVSINEFLKPAEGERYYPGGRGRGRGRGSRG--YSGANTMSNVEAAPPIEDPGH 353
A.thaliana   EKAKKAVSINEFLKPAEGGNYRGGRRGRGRGGVSSGESGGYRNEAAPAIGDAAQ 348
*****:***** ** * ***** ** ** . . *****.* *..:

S.tuberosum   FPTLG GK 360
A.thaliana   FPSLG GK 355
**:*

```

**Figure S1.** Alignment of deduced RGA protein sequences of *S. tuberosum* and *A. thaliana*. The alignment was performed using ClustalW (<http://www.genome.jp/tools/clustalw/>). Asterisks indicate the presence of identical aminoacids in the two aligned sequences, whereas ":" or "." indicate conserved or semi-conserved substitutions, respectively.

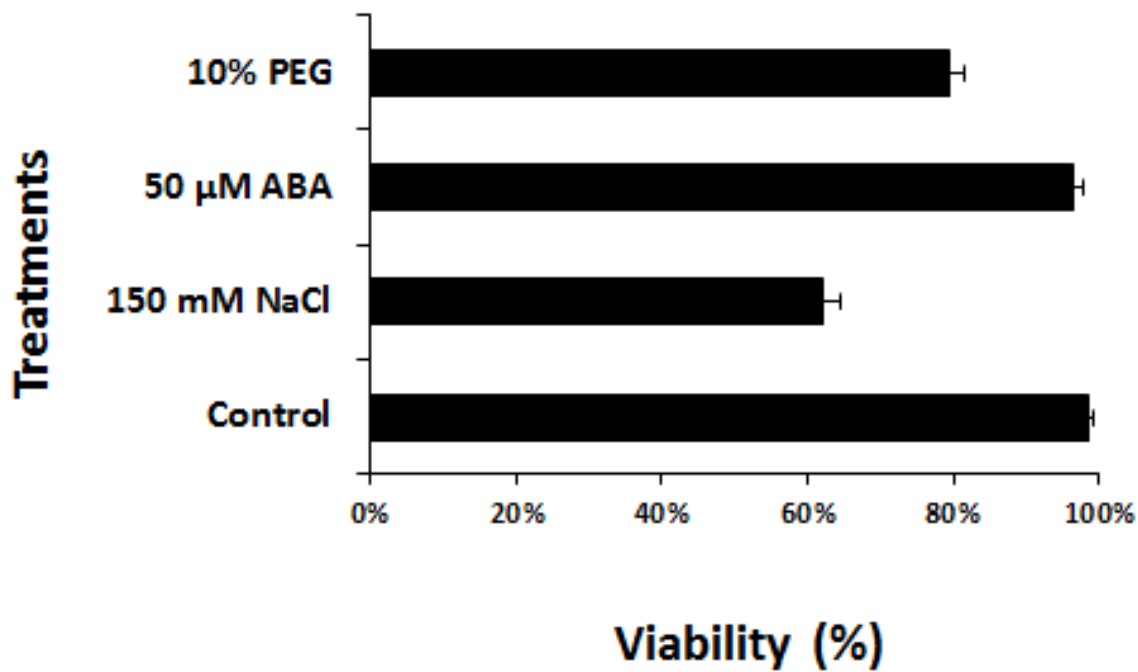

**Figure S2.** Cell viability measured as percentage of Arabidopsis MM2D cells in control conditions or after a 24h exposure to treatments as indicated in figure.

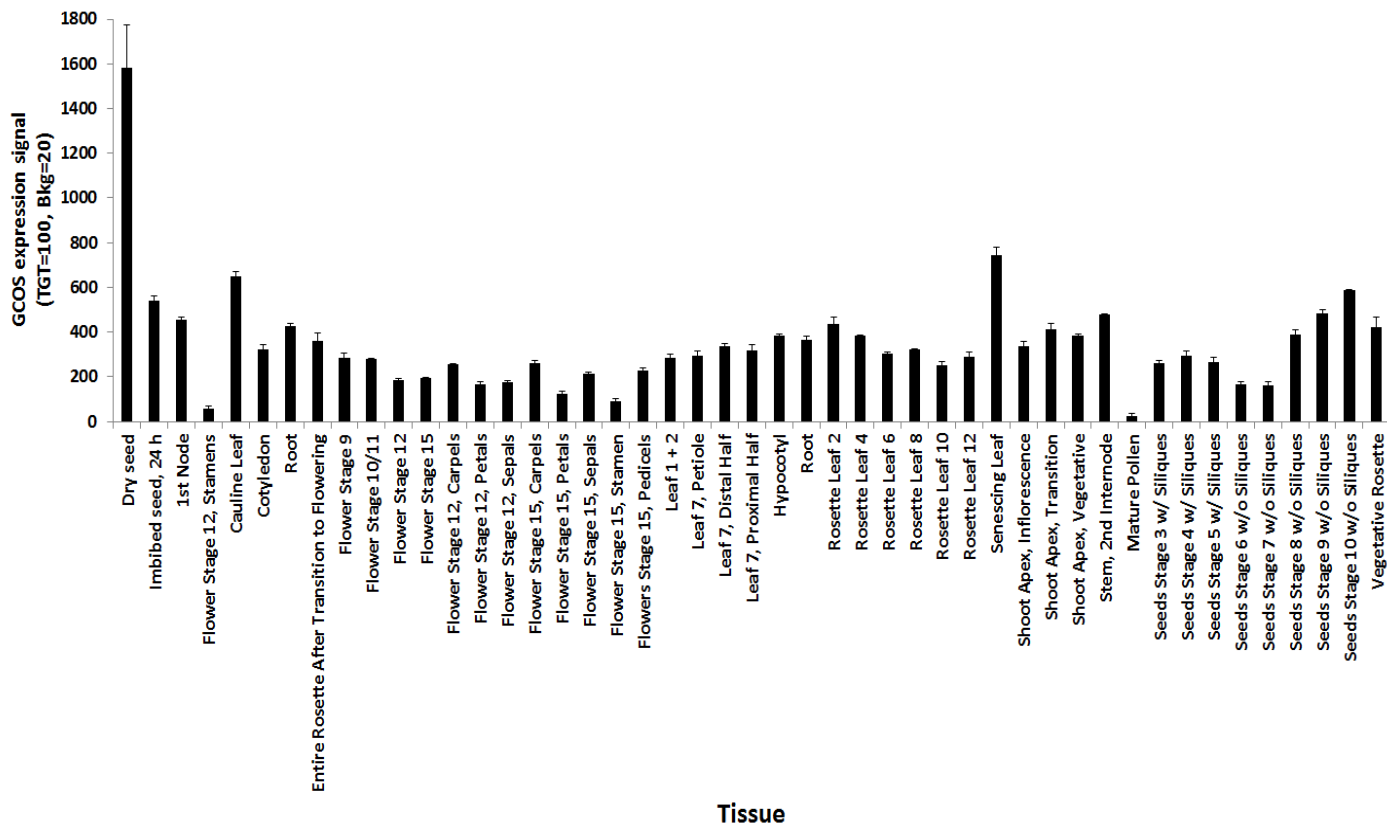

**Figure S3.** *AtRGGa* gene expression in different tissues and developmental stages of Arabidopsis. ATH1 microarray data were gathered and processed using the eFP browser (Winter et al., 2007). Expression signals were generated by the eFP browser using the Gene Chip Operating Signal (GCOS) using target intensity (TGT) and background (bkg) values as indicated in figure.

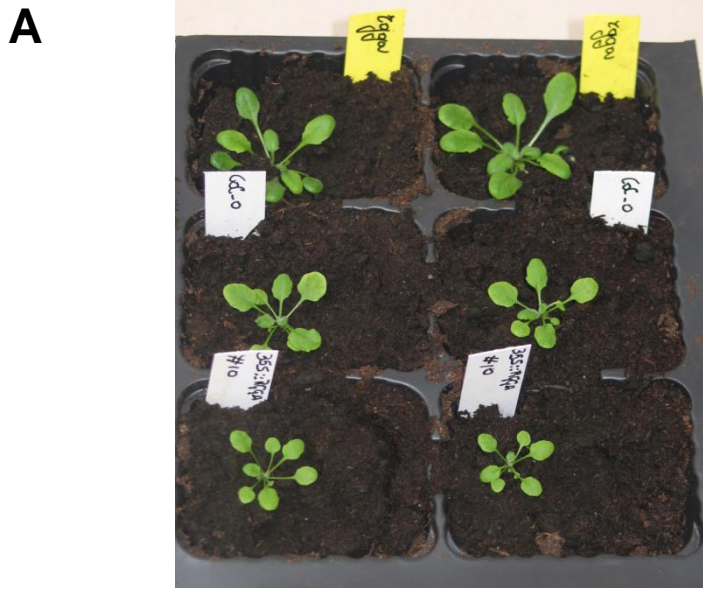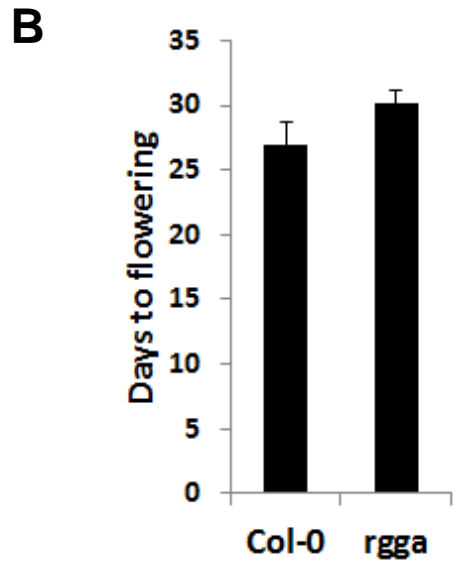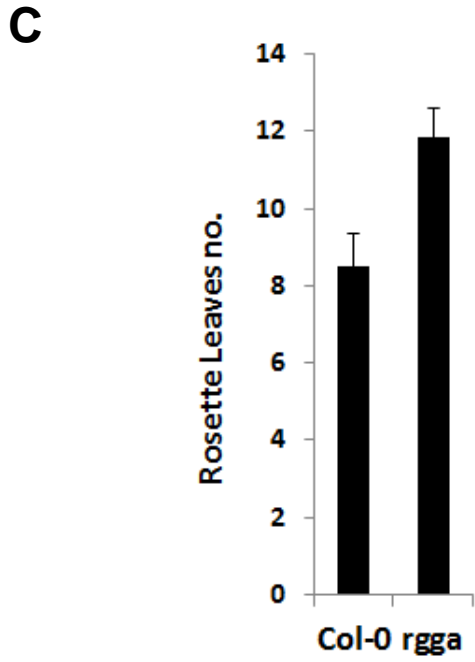

**Figure S4.** Phenotypes of Arabidopsis plants with modified expression of *AtRGGA*.

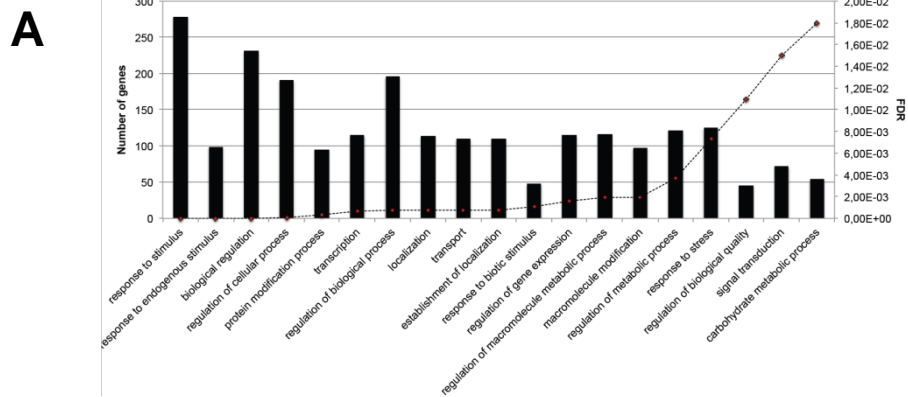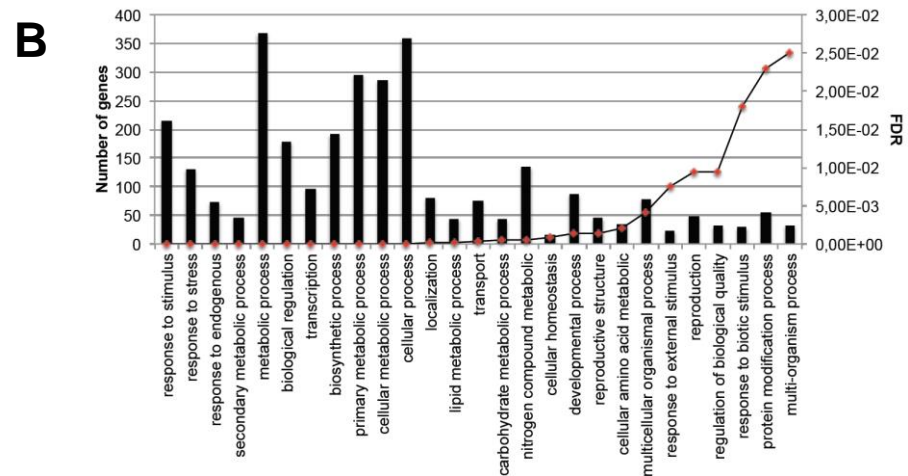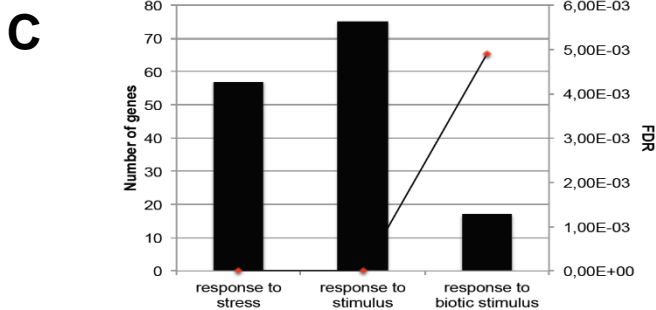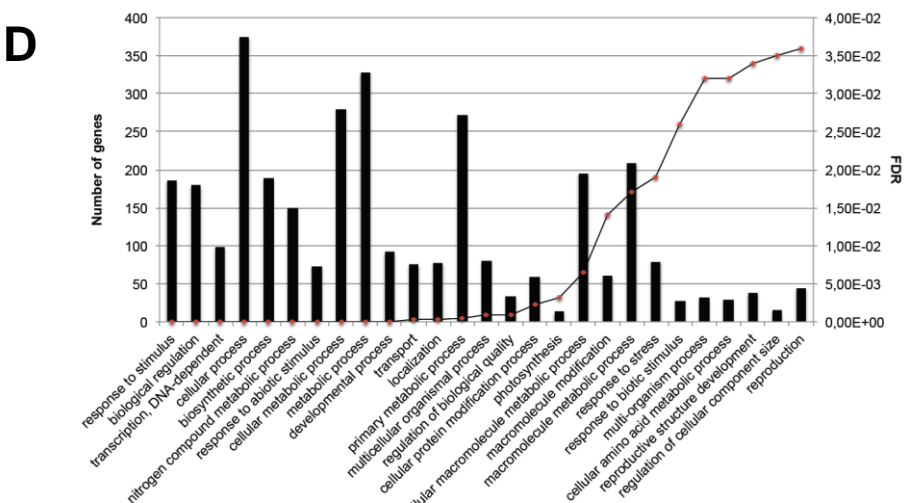

**Figure S5.** Enriched gene ontology categories of differentially expressed genes in 35S::FLAG-RGGA plants. (A) Enriched GO categories of up-regulated genes in control conditions; (B) Enriched GO categories of down-regulated genes in control conditions; (C) Enriched GO categories of up-regulated genes in salt stress conditions. (D) Enriched GO categories of down-regulated genes in salt stress conditions. FDR: False Discovery Rate.

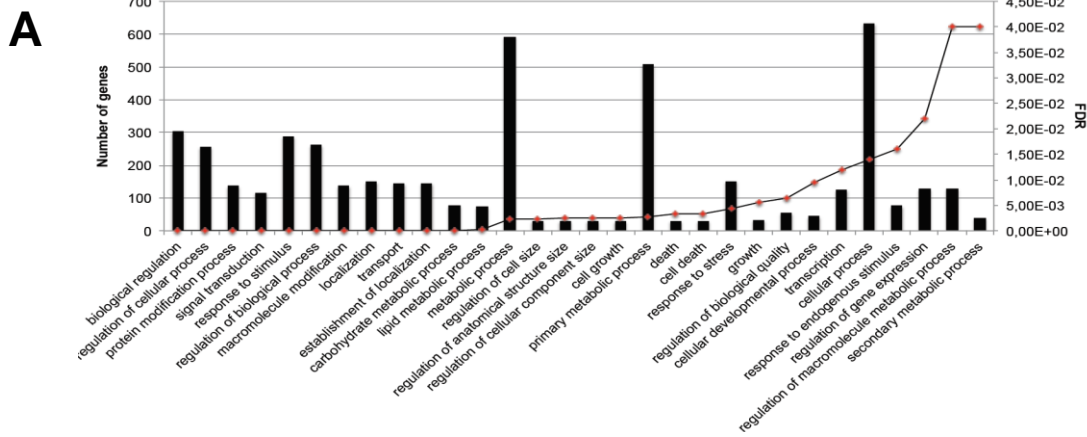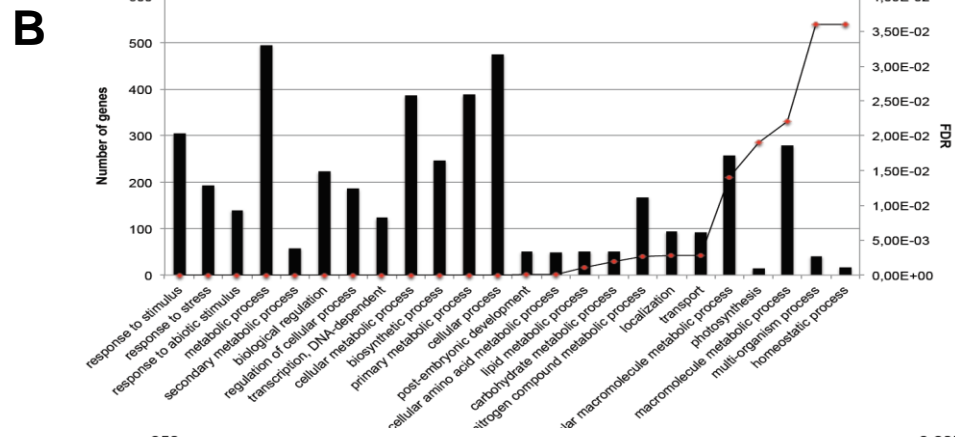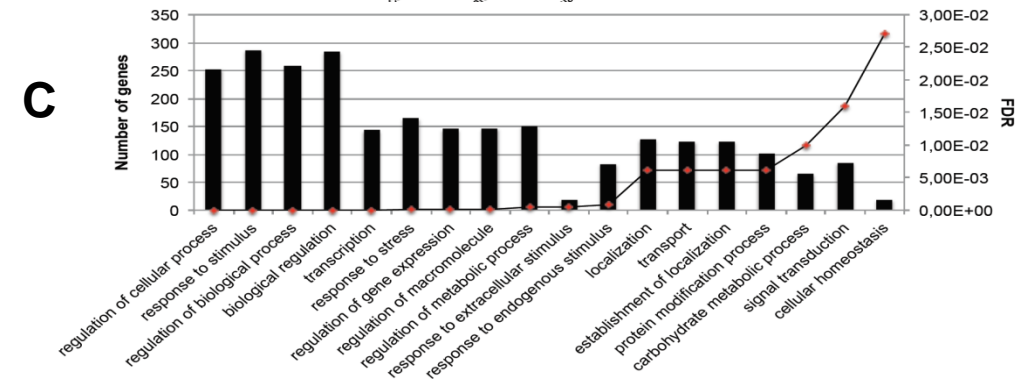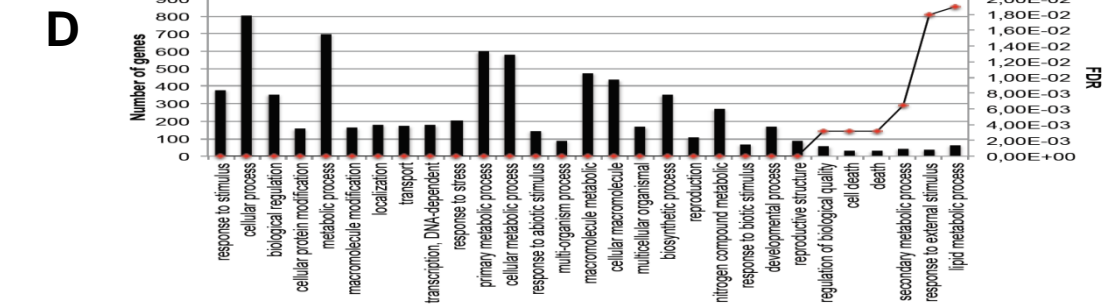

**Figure S6.** Enriched gene ontology categories of differentially expressed genes in *rgga* plants. (A) Enriched GO categories of up-regulated genes in control conditions; (B) Enriched GO categories of down-regulated genes in control conditions; (C) Enriched GO categories of up-regulated genes in salt stress conditions; (D) Enriched GO categories of down-regulated genes in salt stress conditions. FDR: False Discovery Rate.

**Table S1. Primers used in this study**

| <b>Primer Name</b>    | <b>Sequence (5'-3')</b>                                     | <b>Application</b>                              |
|-----------------------|-------------------------------------------------------------|-------------------------------------------------|
| StRGGA FOR            | CGTAGTGGAAGTGGCAGAGG                                        | qRT-PCR, potato                                 |
| StRGGA Rev            | CCAAGAGATGGGAAGTGGAGC                                       | qRT-PCR, potato                                 |
| StElong fact F        | TGTCAAGCAAATGATCTGCTGC                                      | qRT-PCR, potato                                 |
| StElong fact R        | AAGAGCGTCAAGAAGGGTTGG                                       | qRT-PCR, potato                                 |
| CYP707A2 For          | TGGCTACTTGATCCCAAAGG                                        | qRT-PCR, Arabidopsis                            |
| CYP707A2 Rev          | TAAGGTTTTGGTGCCACCTC                                        | qRT-PCR, Arabidopsis                            |
| DIN2 For              | ATGACAACGACGACGGTACA                                        | qRT-PCR, Arabidopsis                            |
| DIN2 Rev              | TACGTCACACCCATCTTCCA                                        | qRT-PCR, Arabidopsis                            |
| PAP14 For             | CAGACGTTTTACCTGCAGAA                                        | qRT-PCR, Arabidopsis                            |
| PAP14 Rev             | CGTCACTTGTCTCGACAAT                                         | qRT-PCR, Arabidopsis                            |
| AT4G34790 For         | AGGTCACGTAGCGGTTTACG                                        | qRT-PCR, Arabidopsis                            |
| AT4G34790 Rev         | CGTCAAGCCACCCATAGAGT                                        | qRT-PCR, Arabidopsis                            |
| Dorm_For              | GCGTAAGGAAAACGTGTGGA                                        | qRT-PCR, Arabidopsis                            |
| Dorm_Rev              | GTGGGAGAGTTTGGGTGAGA                                        | qRT-PCR, Arabidopsis                            |
| HSP70 For             | GGACAACAACCTCCTCGGTA                                        | qRT-PCR, Arabidopsis                            |
| HSP70 Rev             | CAGTGGTCTTGTCCCTCAGCA                                       | qRT-PCR, Arabidopsis                            |
| AAC1 For              | TGCTGCTCCTATTGAACGTG                                        | qRT-PCR, Arabidopsis                            |
| AAC1 Rev              | TGCCGAAACAGTCAACATA                                         | qRT-PCR, Arabidopsis                            |
| bHLH119 For           | AACCAGCCAACCACAAAGAC                                        | qRT-PCR, Arabidopsis                            |
| bHLH119 Rev           | GGAAGGGGAGCATTCTTCTC                                        | qRT-PCR, Arabidopsis                            |
| AtEF-1 For            | TGAGCACGCTCTTCTTGCTTTCA                                     | qRT-PCR, Arabidopsis                            |
| AtEF-1 For            | GGTGGTGGCATCCATCTTGTTACA                                    | qRT-PCR, Arabidopsis                            |
| Rgga Fw Sal I         | ACGCGTCGACAGATGGCAACTTTGAACCCTTT<br>TG                      | Cloning in pET28a                               |
| Rgga Rev NotI         | ATAAGAATGCGGCCGCCTTGCCCCAAGAGAT<br>GG                       | Cloning in pET28a                               |
| SALK143514_LP         | CCTCCTTGTTAGCATCAGCAG                                       | T-DNA Insertion confirmation                    |
| SALK143514_RP         | TCACCAACCAACAAGTTCTCC                                       | T-DNA Insertion confirmation                    |
| LBa1                  | TGGTTCACGTAGTGGGCCATCG                                      | T-DNA Insertion confirmation                    |
| RGGA For              | ATGGCAACTTTGAACCCTTT                                        | RT-PCR to detect presence of<br>RGGA transcript |
| RGGA Rev              | TTACTTGCCCCAAGAGATGG                                        | RT-PCR to detect presence of<br>RGGA transcript |
| ATTrggaFor            | GGGGACAAGTTTGTACAAAAAAGCAGGCTAT<br>GGCAACTTTGAACCCTTT       | Cloning in pDONR207                             |
| ATTrggaRev STOP       | GGGGACCACTTTGTACAAGAAAGCTGGG<br>TCTTACTTGCCCCAAGAGATGG      | Cloning in pDONR207                             |
| ATTrggaRev NO<br>STOP | GGGGACCACTTTGTACAAGAAAGCTGGG<br>TCCTTGCCCCAAGAGATGG         | Cloning in pDONR207                             |
| ATTb1promsa           | GGGGACAAGTTTGTACAAAAAAGCAGGCTTC<br>TGATTTATTAAGAAAAAAGATTTG | RGGA Promoter cloning in<br>pDNOR207            |
| ATTb2promsa           | GGGGACCACTTTGTACAAGAAAGCTGGGTCA<br>TCTTAAACAATCCAAGTGATTAA  | RGGA Promoter cloning in<br>pDNOR207            |

**Table S2. qRT-PCR validation of microarrays**

| <b>Gene Name</b> | <b>Locus</b> | <b>Genotype/Treatment</b> | <b>Regulation</b> | <b>Fold-change (Microarrays)</b> | <b>Fold-change (qRT-PCR)</b> | <b>p value (qRT-PCR)</b> |
|------------------|--------------|---------------------------|-------------------|----------------------------------|------------------------------|--------------------------|
| <b>SAUR3</b>     | At4g34790    | rgga/0 NaCl               | Up                | 12.94                            | 28                           | 0.0185                   |
| <b>PAP14</b>     | At2g46880    | rgga/180mM NaCl           | Up                | 86.54                            | 198                          | 0.0019                   |
| <b>DRM2</b>      | At2g33830    | 35S::RGGA/0 NaCl          | Up                | 2.59                             | 3.95                         | 0.1074                   |
| <b>CYP707A2</b>  | At2g29090    | rgga/0 NaCl               | Down              | -56.14                           | -5.55                        | 0.0011                   |
| <b>HSP70-2</b>   | At5g02490    | 35S::RGGA/<br>0 NaCl      | Down              | -3.06                            | -2.38                        | 0.0003                   |
| <b>CYP707A2</b>  | At2g29090    | 35S::RGGA/<br>180mM NaCl  | Down              | -34.41                           | -4.16                        | 0.0146                   |
| <b>bHLH119</b>   | At4g28811    | 35S::RGGA/<br>180mM NaCl  | Up                | 10.79                            | 2.55                         | 0.0218                   |
